# Supplementary material for: Citations of microRNA Biomarker Articles That Were Retracted: A Systematic Review
Source: PubMed Central journal article supplement (PMC10958238; doi:10.1001/jamanetworkopen.2024.3173), 2024-03-21
Supplement: jamanetwopen-e243173-s002.pdf [file jamanetwopen-e243173-s002.pdf]

## Data Sharing Statement

Zhu. Citations of microRNA Biomarker Studies That Were Retracted: A Systematic Review. *JAMA Netw Open*. Published online March 21, 2024. doi:10.1001/jamanetworkopen.2024.3173

### Data

**Data available:** Yes

**Data types:** Data (not involving human participants)

**How to access data:** The data will be provided as a supplement to the paper. **When available:** With publication

### Supporting Documents

**Document types:** None

### Additional Information

**Who can access the data:** The data will be provided as a supplement to the paper for anyone who has access to the paper.

**Types of analyses:** Basic statistics.

**Mechanisms of data availability:** Without investigator support.
